# Supplementary material for: Synthesis and Investigation of Novel CHCA-Derived Matrices for Matrix-Assisted Laser Desorption/Ionization Mass Spectrometric Analysis of Lipids
Source: MDPI journal article supplement (doi:10.3390/molecules27082565), 2022-04-15
Supplement: s1 [file s1]

# Synthesis and investigation of novel CHCA-derived matrices for matrix-assisted laser desorption/ionization mass spectrometric analysis of lipids

Antonio Monopoli<sup>1\*</sup>, Giovanni Ventura<sup>1</sup>, Andrea Aloia<sup>1</sup>, Fulvio Ciriaco<sup>1</sup>, Angelo Nacci<sup>1,2</sup>, Tommaso R.I. Cataldi<sup>1,3</sup>, Cosima D. Calvano<sup>1,3\*</sup>

<sup>1</sup>Dipartimento di Chimica, Università degli Studi di Bari Aldo Moro, Via Orabona, 4 - 70126 Bari (Italy)

<sup>2</sup>CNR—Istituto di Chimica dei Composti Organometallici (ICCOM), Bari Section, Università degli Studi di Bari Aldo Moro, Via Orabona, 4 - 70126 Bari (Italy)

<sup>3</sup>Centro Interdipartimentale di Ricerca S.M.A.R.T., Università degli Studi di Bari Aldo Moro, Via Orabona, 4 - 70126 Bari (Italy)

## Contents:

*Figure S1.* Positive MALDI-ToF MS spectra of the TAG mixture composed of trilaurin (LLL, 638.55 Da), trimyristin (MMM, 722.64 Da), tripalmitin (PPP, 806.74 Da), and tristearin (SSS, 890.83 Da) mixed with examined compounds **1** (A), **2** (B), **6** (C) and **7** (D).

*Figure S2.* The performance dependence in terms of S/N ratio on the proton affinities (red circles), extinction coefficients (blue circles), and logP (green circles) of each matrix applied to phosphatidylcholine (A), phosphatidylethanolamine (B), and triacylglycerol (C). Matrix **11** refers to CHCA while **12** corresponds to C1CCA.

*Figures S3-S12. NMR Spectra*

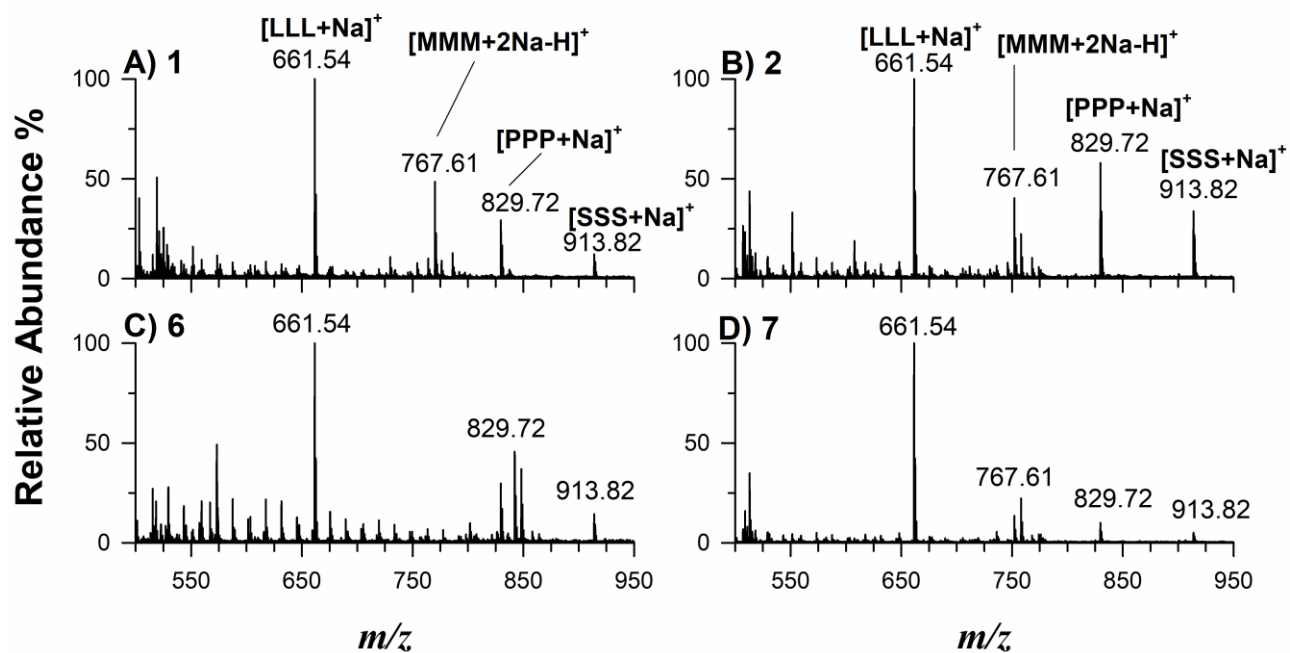

**Figure S1.** Positive MALDI-ToF MS spectra of the TAG mixture composed of trilaurin (LLL, 638.55 Da), trimyristin (MMM, 722.64 Da), tripalmitin (PPP, 806.74 Da), and tristearin (SSS, 890.83 Da) mixed with examined compounds **1** (A), **2** (B), **6** (C) and **7** (D).

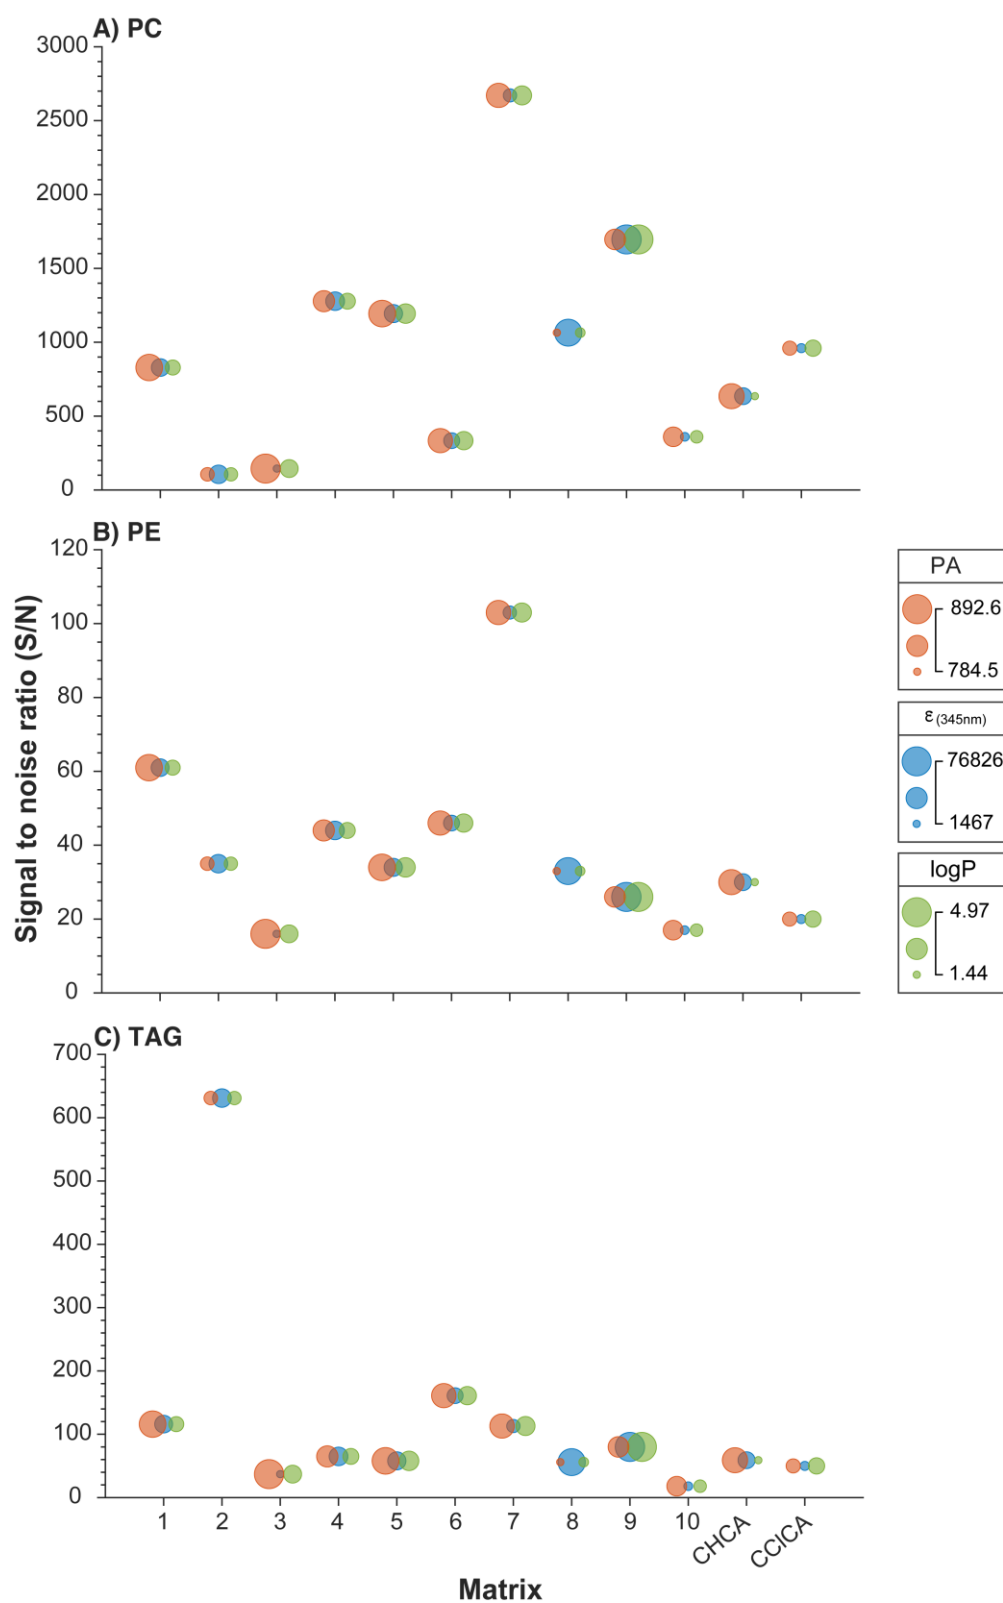

**Figure S2.** The performance dependence in terms of S/N ratio on the proton affinities (red circles), extinction coefficients (blue circles), and logP (green circles) of each matrix applied to phosphatidylcholine (A), phosphatidylethanolamine (B), and triacylglycerol (C). Matrix **11** refers to CHCA while **12** corresponds to CCICA.

*(2E,4E)-2-cyano-5-(4-methoxyphenyl)penta-2,4-dienoic acid (1)*. This acid was obtained as a pale-yellow solid (m.p. 246-248°C) in a 82% of yield.  $^1\text{H-NMR}$  (400 MHz, DMSO- $\text{D}_6$ ),  $\delta$ : 3.82 (s, 3H, methoxy), 7.02 (d, 2 H,  $J$ = 8.80 Hz, aromatic protons), 7.07 (dd, 1 H,  $J$ = 15.16 and 11.74 Hz, vinyl proton), 7.59 (d, 1 H,  $J$ = 15.16 Hz, vinyl proton), 7.67 (d, 2 H,  $J$ = 8.80 Hz, aromatic protons), 8.05 (d, 1 H,  $J$ = 11.74 Hz, vinyl proton);  $^{13}\text{C-NMR}$  (DMSO- $\text{D}_6$ )  $\delta$ : 163.37, 161.63, 155.51, 149.10, 130.47, 127.34, 120.28, 115.20, 114.64, 102.67, 55.35. HRMS (ESI-TOF)  $m/z$   $[\text{M}+\text{H}]^+$ : calcd for  $\text{C}_{13}\text{H}_{12}\text{NO}_3^+$  230,0812, found 230.0822.

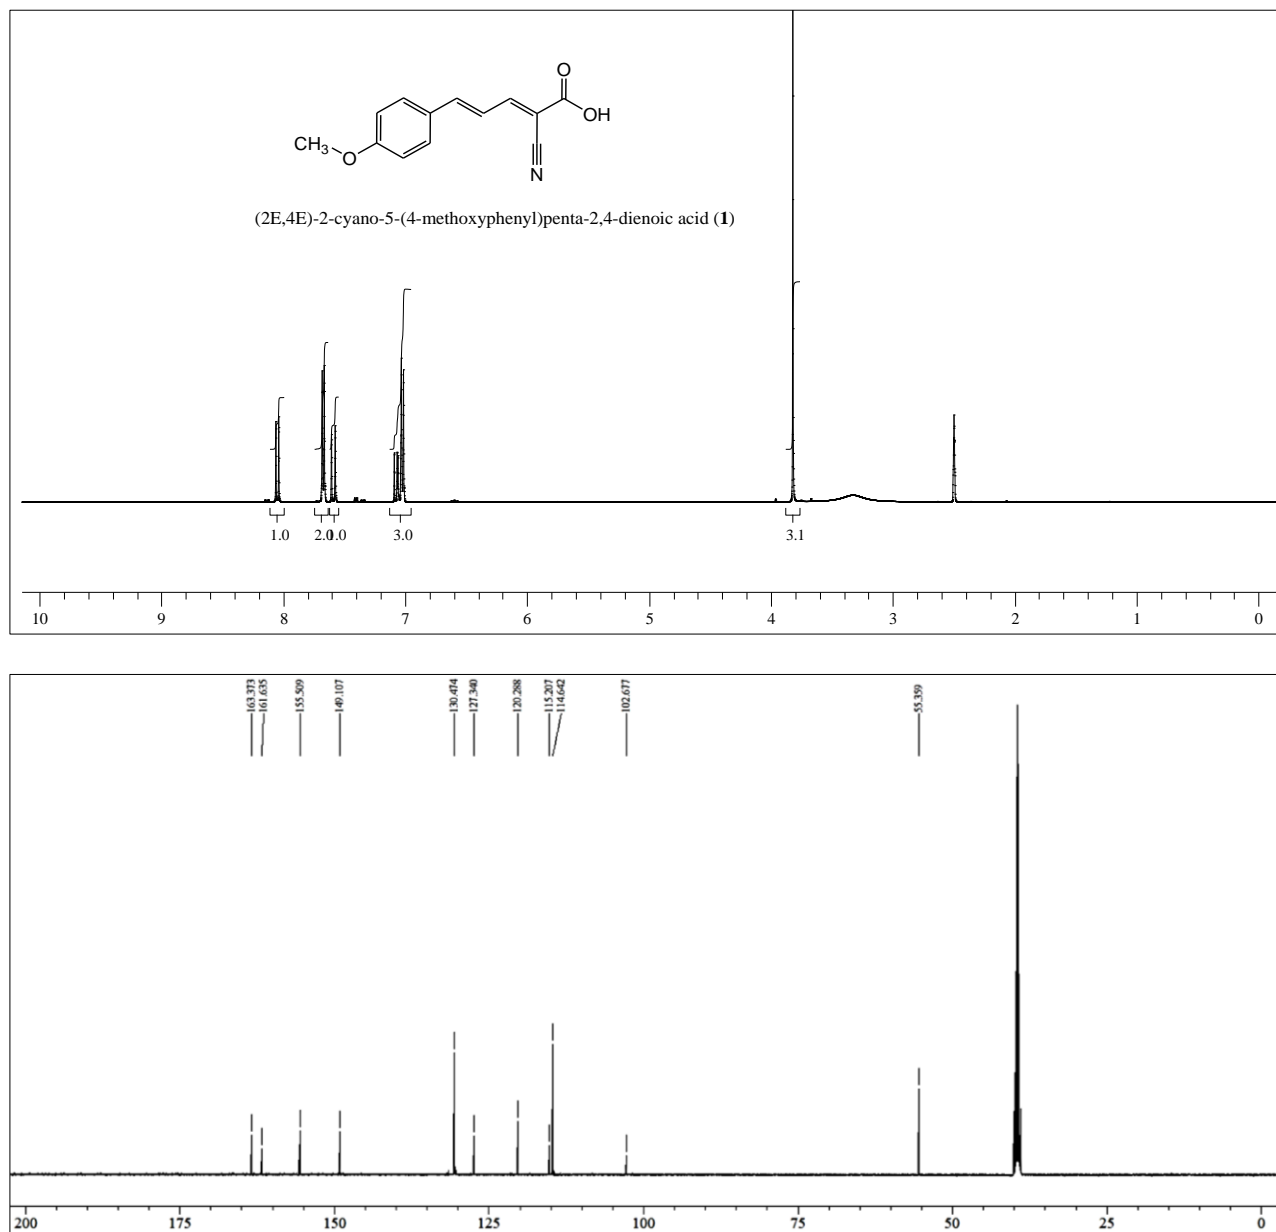

**Figure S3.**  $^1\text{H-NMR}$  and  $^{13}\text{C-NMR}$  spectra of the compound 1.

(2E,4E)-2-cyano-5-(4-nitrophenyl)penta-2,4-dienoic acid (2). This acid was obtained as a bright yellow solid in a 72% of yield.  $^1\text{H-NMR}$  (400 MHz, DMSO- $\text{D}_6$ ),  $\delta$ : 7.37 (dd, 1 H,  $J = 15.65$  and  $11.74$  Hz, vinyl proton), 7.73 (d, 1 H,  $J = 15.65$  Hz, vinyl proton), 7.97 (d, 2 H,  $J = 8.80$  Hz, aromatic protons), 8.10 (d, 1 H,  $J = 11.74$  Hz, vinyl proton), 8.27 (d, 2 H,  $J = 8.80$  Hz, aromatic protons);  $^{13}\text{C-NMR}$  (DMSO- $\text{D}_6$ )  $\delta$ : 162.73, 153.75, 147.93, 145.47, 140.85, 129.37, 126.51, 124.05, 114.64, 107.38. HRMS (ESI-TOF)  $m/z$   $[\text{M}+\text{H}]^+$ : calcd for  $\text{C}_{12}\text{H}_9\text{N}_2\text{O}_4^+$  245,0557, found 245,0568.

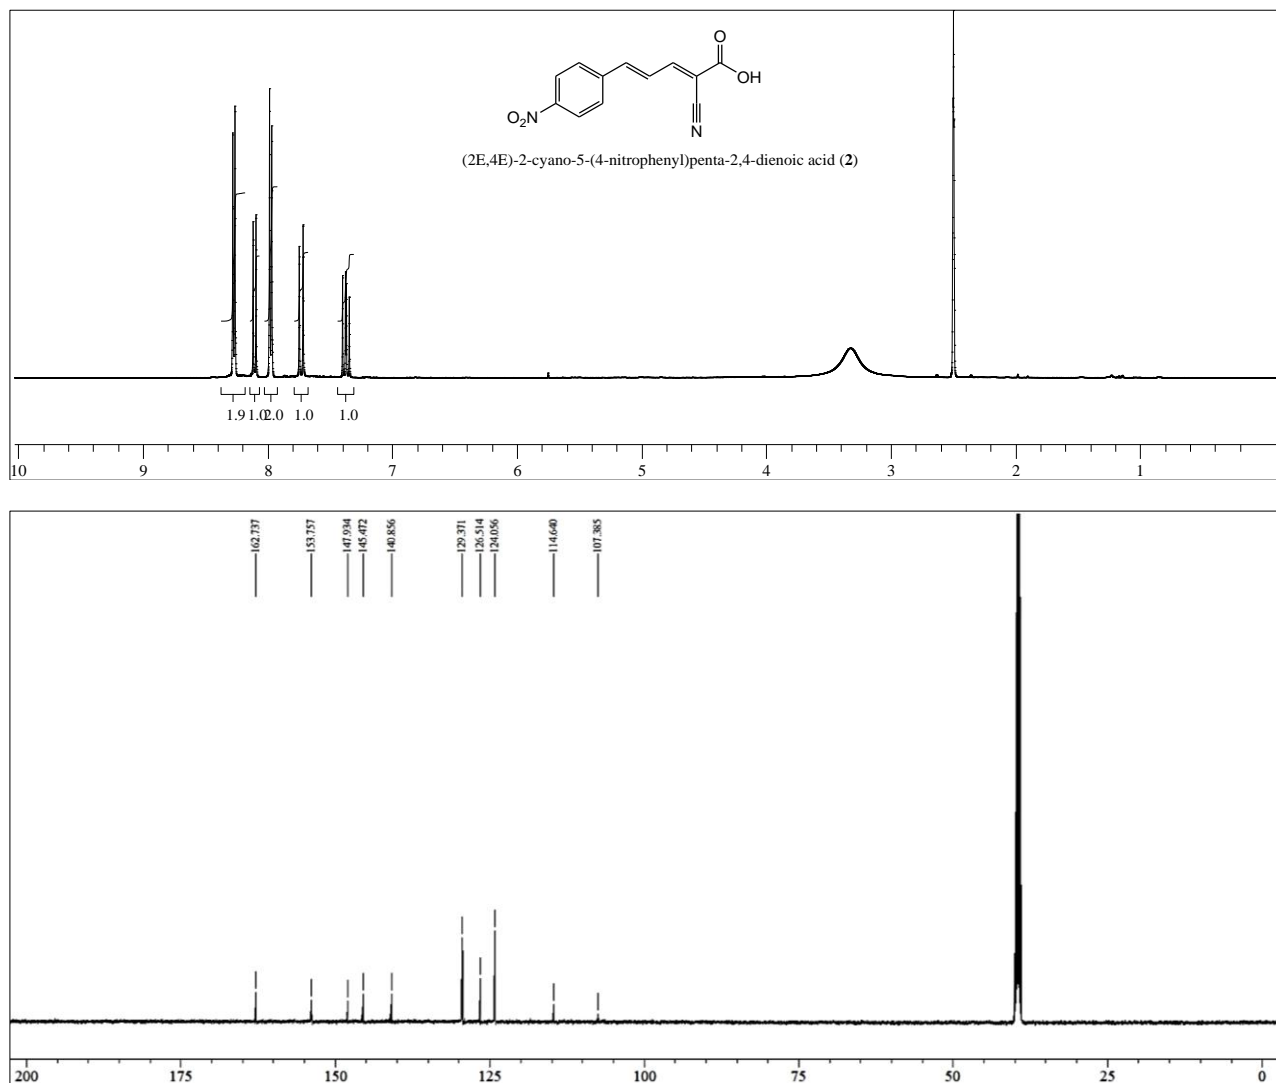

**Figure S4.**  $^1\text{H-NMR}$  and  $^{13}\text{C-NMR}$  spectra of the compound 2.

(2E,4E)-2-cyano-5-(4-(dimethylamino)phenyl)penta-2,4-dienoic acid (3). This acid was obtained as a dark solid (mp 221–223 °C) in a 55% of yield.  $^1\text{H-NMR}$  (DMSO- $\text{D}_6$ ),  $\delta$ : 3.02 (s, 6 H, methyl groups), 6.75 (d, 2 H,  $J=8.94$  Hz, aromatic protons), 6.91 (dd, 1 H,  $J=14.90$  and  $11.92$ , vinyl proton), 7.51 (d, 1 H,  $J=14.90$ , vinyl proton), 7.53 (d, 2 H,  $J=8.94$ , aromatic protons), 7.99 (d, 1 H,  $J=11.92$  Hz); Lit. [1].

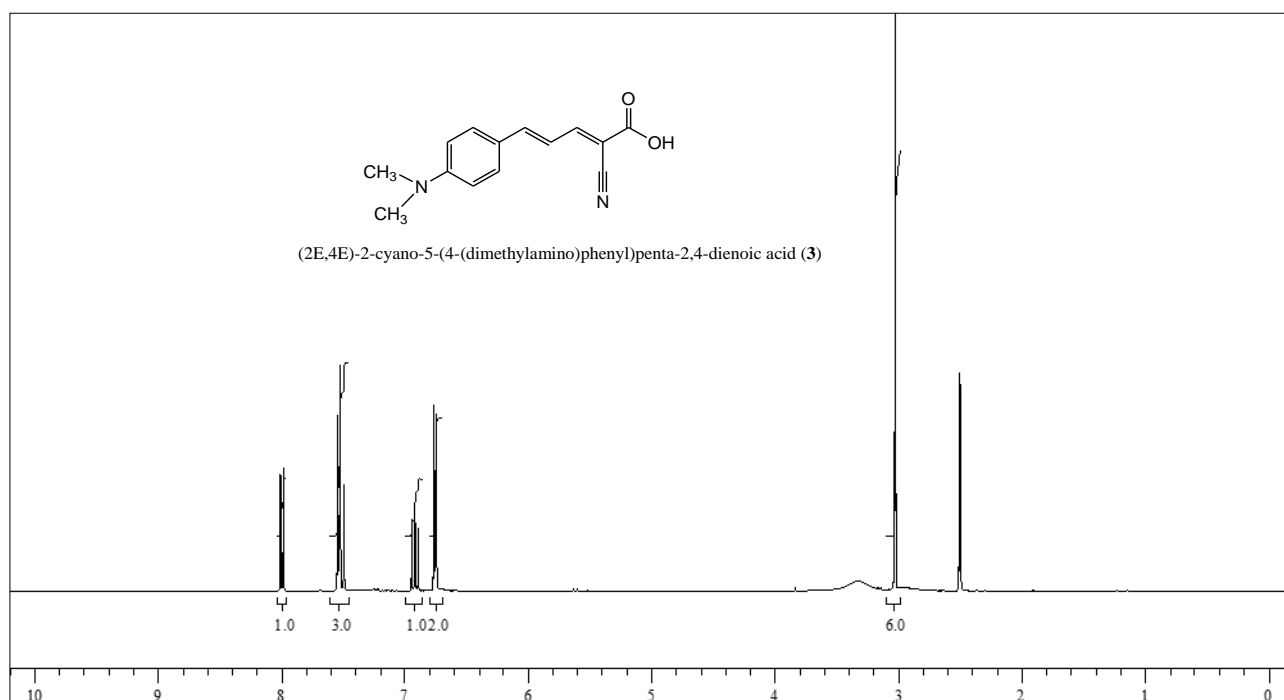

**Figure S5.**  $^1\text{H-NMR}$  spectrum of the compound 3.

<sup>1</sup> K. Hara, M. Kurashige, S. Ito, A. Shinpo, S. Suga, K. Sayama, H. Arakawa *Chem. Commun.*, 2003, 252–253.

(2E,4E)-2-cyano-5-phenylpenta-2,4-dienoic acid (4).  $^1\text{H-NMR}$  (DMSO- $\text{D}_6$ ),  $\delta$ : 7.20 (dd, 1 H,  $J = 15.30$  and  $11.52$  Hz, vinyl proton), 7.45 (m, 3 H, aromatic protons), 7.63 (d, 1 H,  $J = 15.30$ , vinyl proton), 7.70 (m, 2 H, aromatic protons), 8.07 (d, 1 H,  $J = 11.52$  Hz, vinyl proton). Lit. [2].

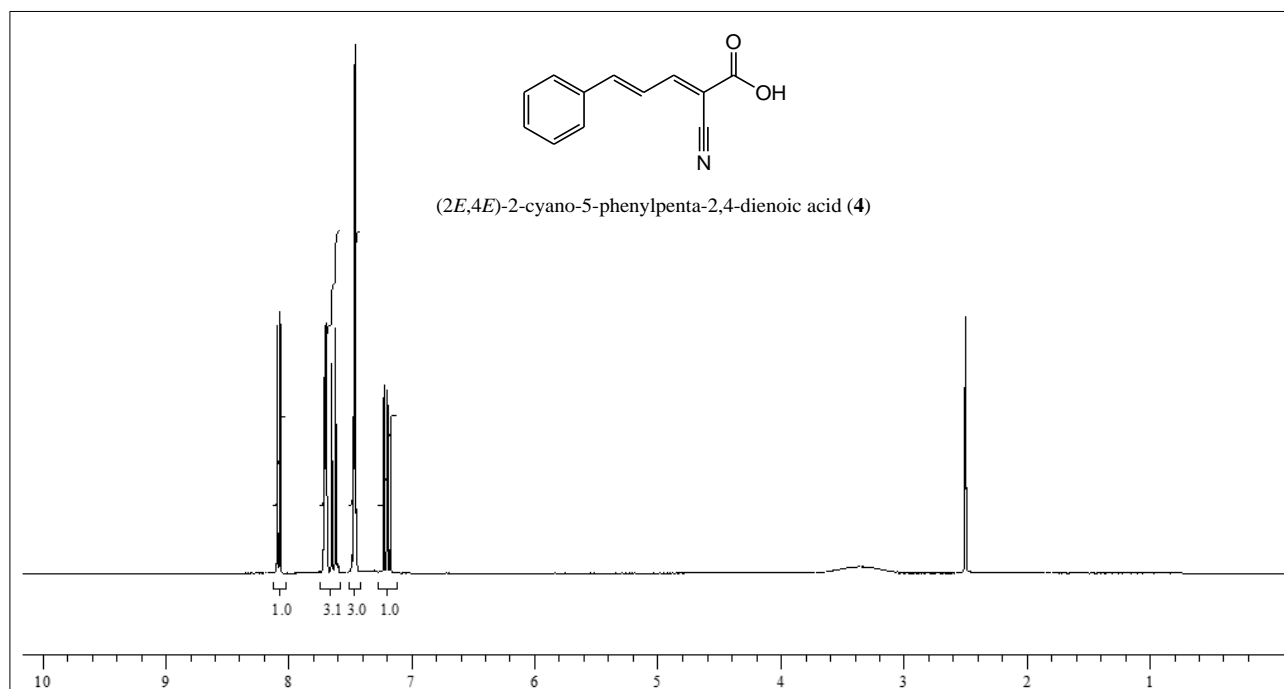

**Figure S6.**  $^1\text{H-NMR}$  spectrum of the compound 4.

*(2E,4E)*-5-(4-chlorophenyl)-2-cyanopenta-2,4-dienoic acid (**5**). This acid was obtained as a deep yellow solid (m.p. 235-236°C) in a 68% of yield.  $^1\text{H-NMR}$  (400 MHz, DMSO- $\text{D}_6$ ),  $\delta$ : 7.21 (dd, 1 H,  $J$ = 15.30 and 11.72 Hz, vinyl proton), 7.51 (d, 2 H,  $J$ = 8.54 Hz, aromatic protons), 7.62 (d, 1 H,  $J$ = 15.30 Hz, vinyl proton), 7.73 (d, 2 H,  $J$ = 8.54 Hz, aromatic protons), 8.07 (d, 1 H,  $J$ = 11.52 Hz, vinyl proton);  $^{13}\text{C-NMR}$  (DMSO- $\text{D}_6$ )  $\delta$ : 163.02, 154.61, 147.18, 135.30, 133.56, 130.07, 129.10, 123.35, 114.85, 105.26. HRMS (ESI-TOF)  $m/z$   $[\text{M}+\text{H}]^+$ : calcd for  $\text{C}_{12}\text{H}_9\text{ClNO}_2^+$  234,0316, found 234,0328.

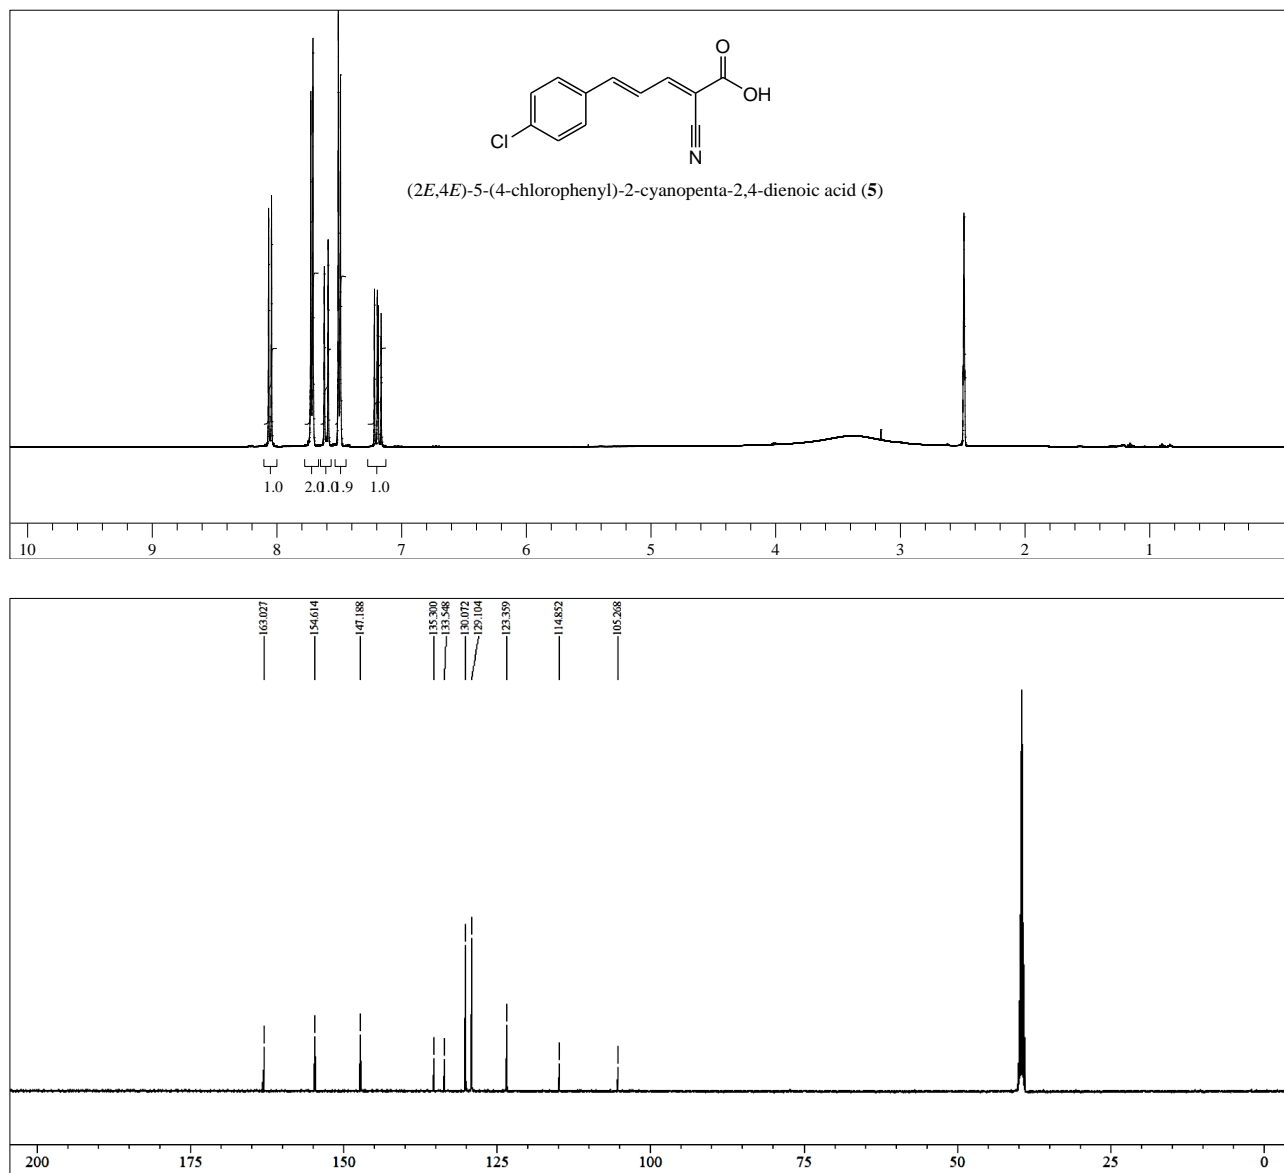

**Figure S7.**  $^1\text{H-NMR}$  and  $^{13}\text{C-NMR}$  spectra of the compound **5**.



(E)-2-cyano-3-(6-methoxynaphthalen-2-yl)acrylic acid (6). This acid was obtained as a yellow solid (m.p. 248-250°C) in a 75% of yield.  $^1\text{H-NMR}$  (400 MHz,  $\text{DMSO-D}_6$ ),  $\delta$ : 3.93 (s, 3 H, methoxy), 7.28 (dd, 1 H,  $J = 8.94$  and  $2.38$  Hz), 7.43 (d, 1 H,  $J = 2.38$  Hz), 7.94 (d, 1 H,  $J = 9.14$  Hz), 7.97 (d, 1 H,  $J = 8.74$  Hz), 8.18 (dd, 1 H,  $J = 8.74$  and  $1.59$  Hz), 8.41 (s, 1 H), 8.48 (s, 1 H);  $^{13}\text{C-NMR}$   $\delta$ : 163.45, 159.73, 154.15, 136.59, 133.94, 130.88, 127.61, 127.60, 126.71, 125.12, 119.82, 116.46, 106.26, 101.89, 55.42. HRMS (ESI-TOF)  $m/z$   $[\text{M}+\text{H}]^+$ : calcd for  $\text{C}_{15}\text{H}_{12}\text{NO}_3^+$  254,0812, found 254,0824.

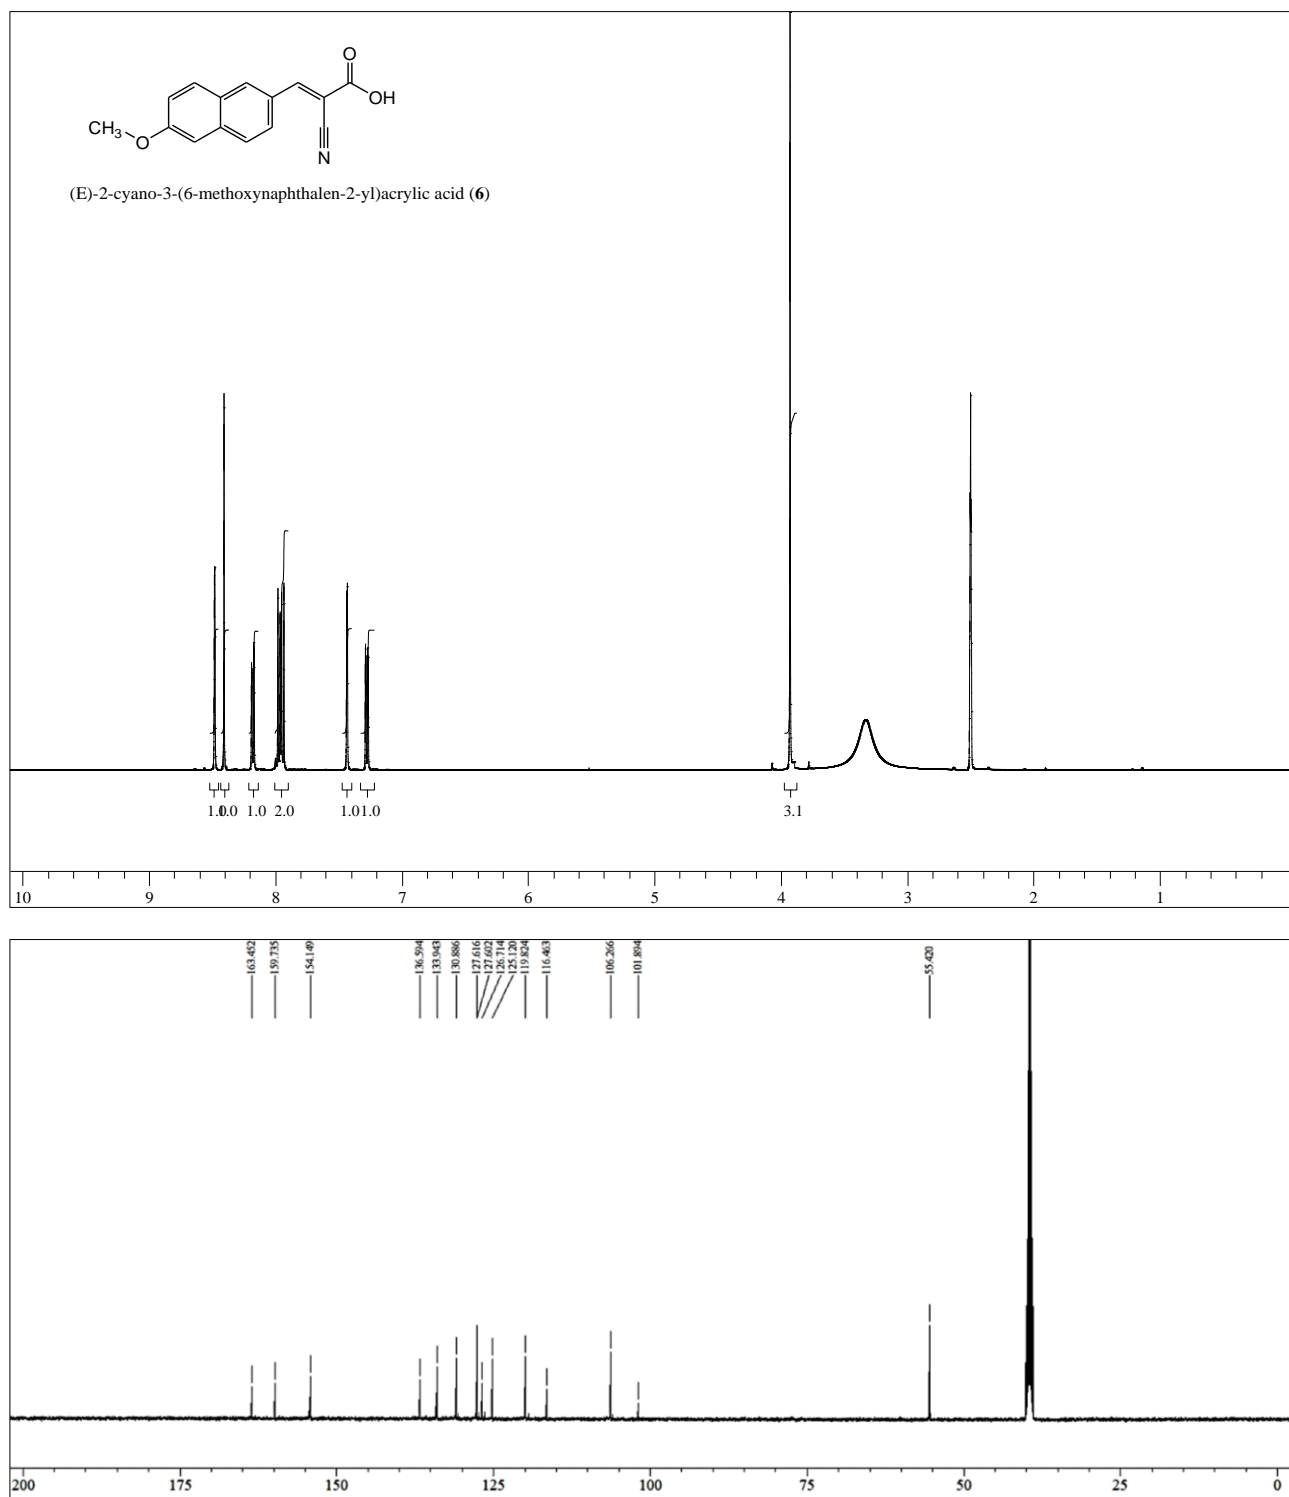

**Figure S8.**  $^1\text{H-NMR}$  and  $^{13}\text{C-NMR}$  spectra of the compound 6.

(E)-2-cyano-3-(naphthalen-2-yl)acrylic acid (7). This acid was obtained as a white solid in a 86% of yield.  $^1\text{H-NMR}$  (DMSO- $\text{D}_6$ ),  $\delta$ : 7.67 (m, 2 H), 8.02 (m, 2 H), 8.09 (d, 1 H,  $J = 8.80$  Hz), 8.19 (dd, 1 H,  $J = 8.31$  and  $1.47$  Hz), 8.48 (s, 1 H), 8.56 (s, 1 H). Lit. [3].

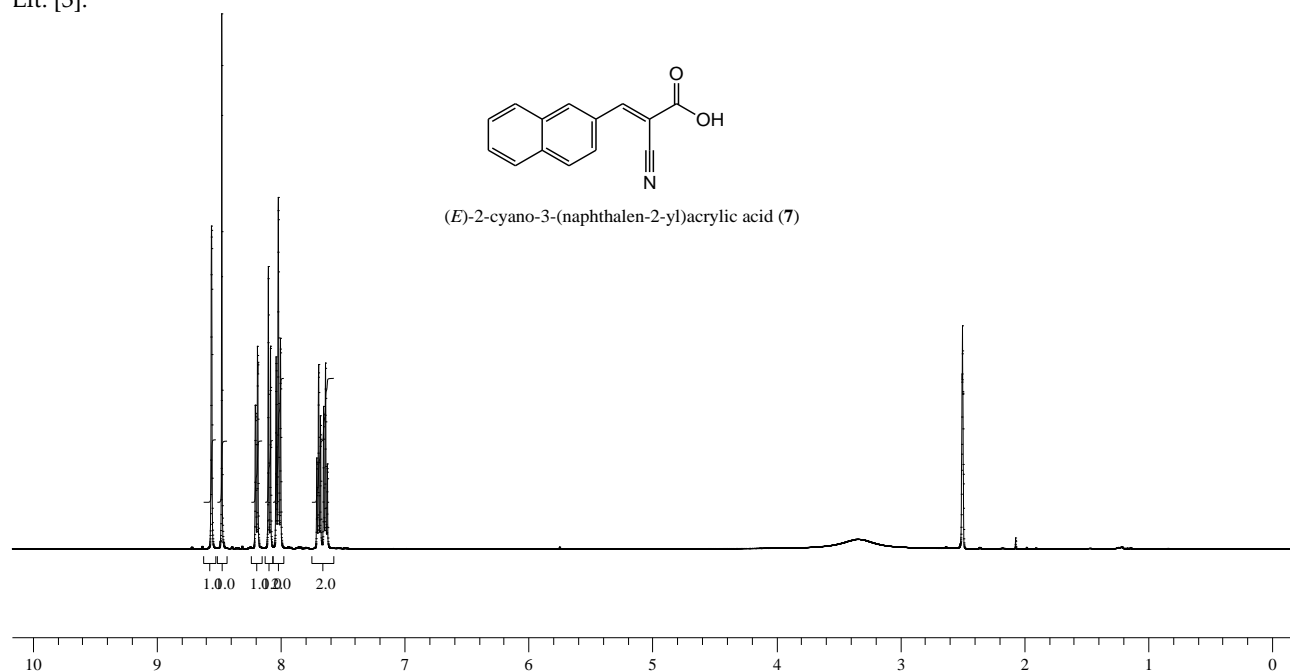

**Figure S9.**  $^1\text{H-NMR}$  spectrum of the compound 7.

(2E,2'E)-3,3'-(1,4-phenylene)bis(2-cyanoacrylic acid) (8). This acid was obtained as a deep yellow in a 81% of yield. In this case, terephthalaldehyde was condensed with cyanoacetic acid.

$^1\text{H-NMR}$  (DMSO- $\text{D}_6$ ),  $\delta$ : 8.16 (s, 4 H), 8.39 (s, 2 H).  $^{13}\text{C-NMR}$  (DMSO- $\text{D}_6$ )  $\delta$ : 162.73, 152.54, 134.96, 130.77, 115.69, 106.23. HRMS (ESI-TOF)  $m/z$   $[\text{M}+\text{H}]^+$ : calcd for  $\text{C}_{14}\text{H}_9\text{N}_2\text{O}_4^+$  269,0557, found 269,0569.

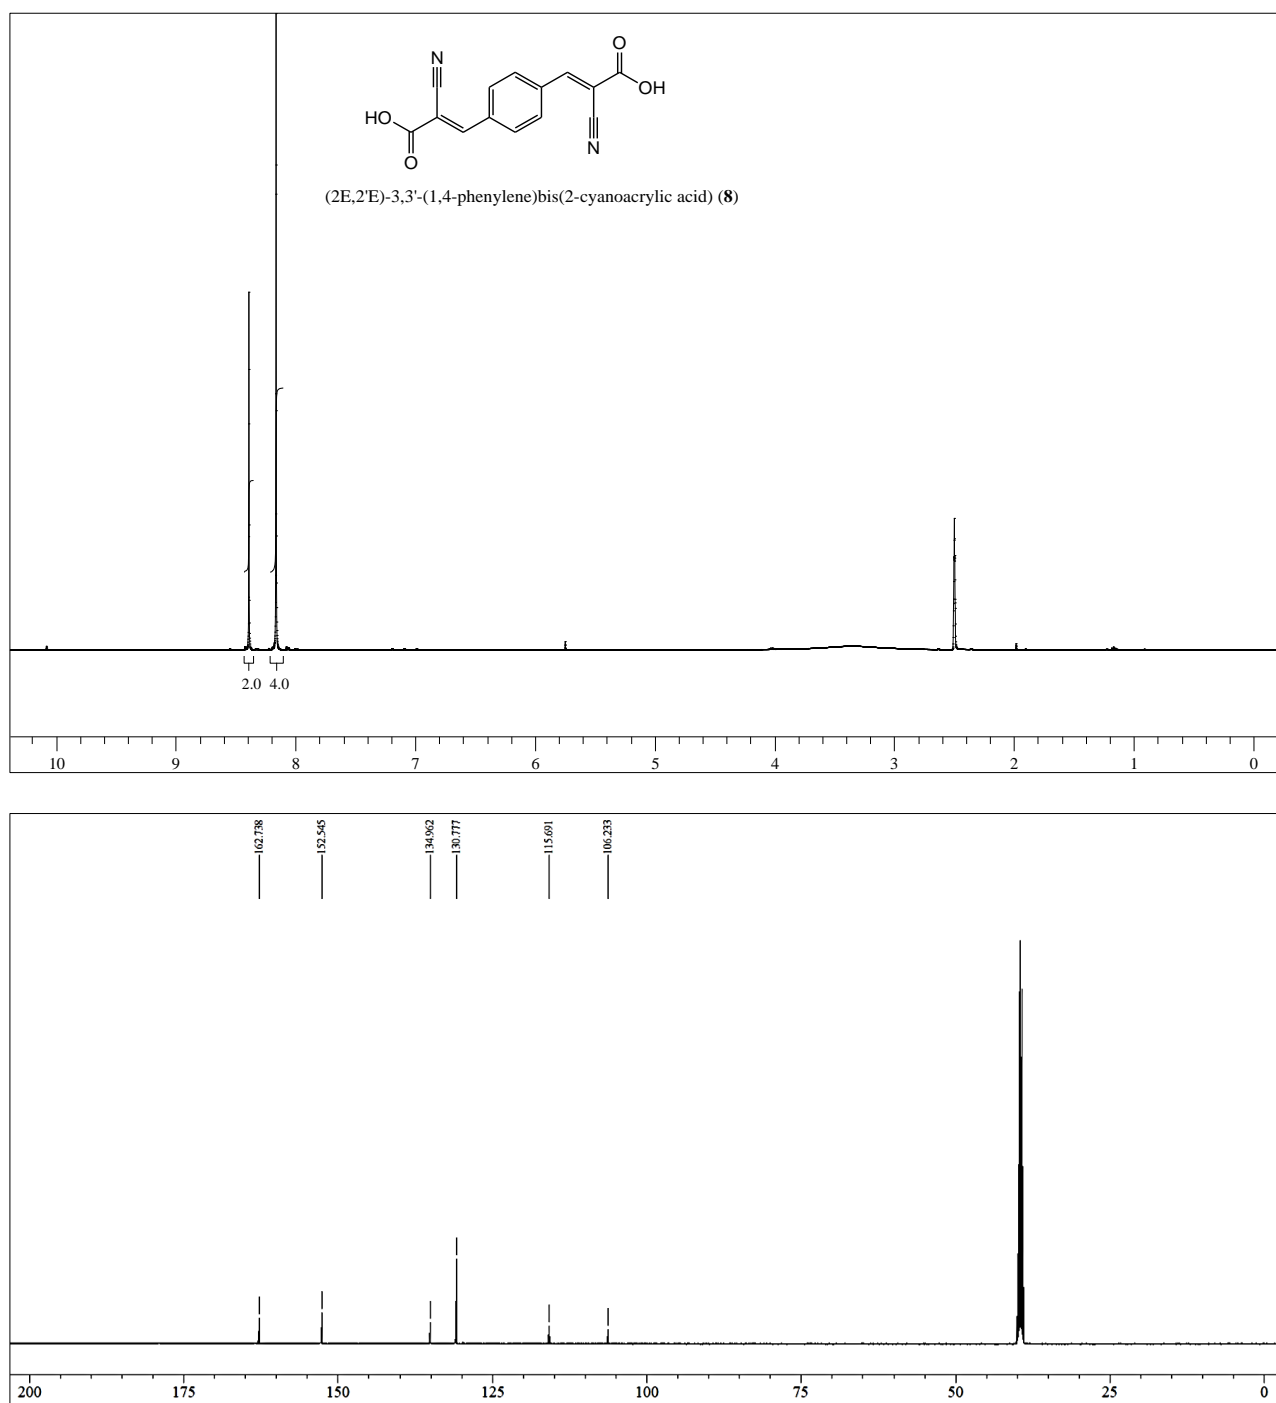

**Figure S10.**  $^1\text{H-NMR}$  and  $^{13}\text{C-NMR}$  spectra of the compound 8.

(*E*)-3-(4''-(*E*)-2-carboxy-2-cyanovinyl)-[1,1':4',1''-terphenyl]-4-yl)-2-cyanoacrylic acid (**9**). This acid was obtained as an orange solid (m.p. 264-265°C) in a 54% of yield. The matrix was obtained by a Knoevenagel condensation between cyanoacetic acid and [1,1':4',1''-terphenyl]-4,4''-dicarbaldehyde. This dicarbaldehyde was synthesized starting from 1,4-dibromo benzene and (4-formylphenyl)boronic acid following a literature procedure (*Synthetic Communications*, **2005**, vol. 35, 2, p. 161 - 167)

<sup>1</sup>H-NMR (DMSO-D<sub>6</sub>), δ: 7.48 (m, 4 H, AA'BB' spin system), 7.83 (d, 4 H, J= 8.31 Hz), 8.08 (d, 4 H, J= 8.31 Hz), 8.31 (s, 2 H, vinyl protons). <sup>13</sup>C-NMR (DMSO-D<sub>6</sub>) δ: 163.28, 153.27, 141.64, 136.98, 131.18, 130.53, 127.70, 127.03, 116.34, 102.83.

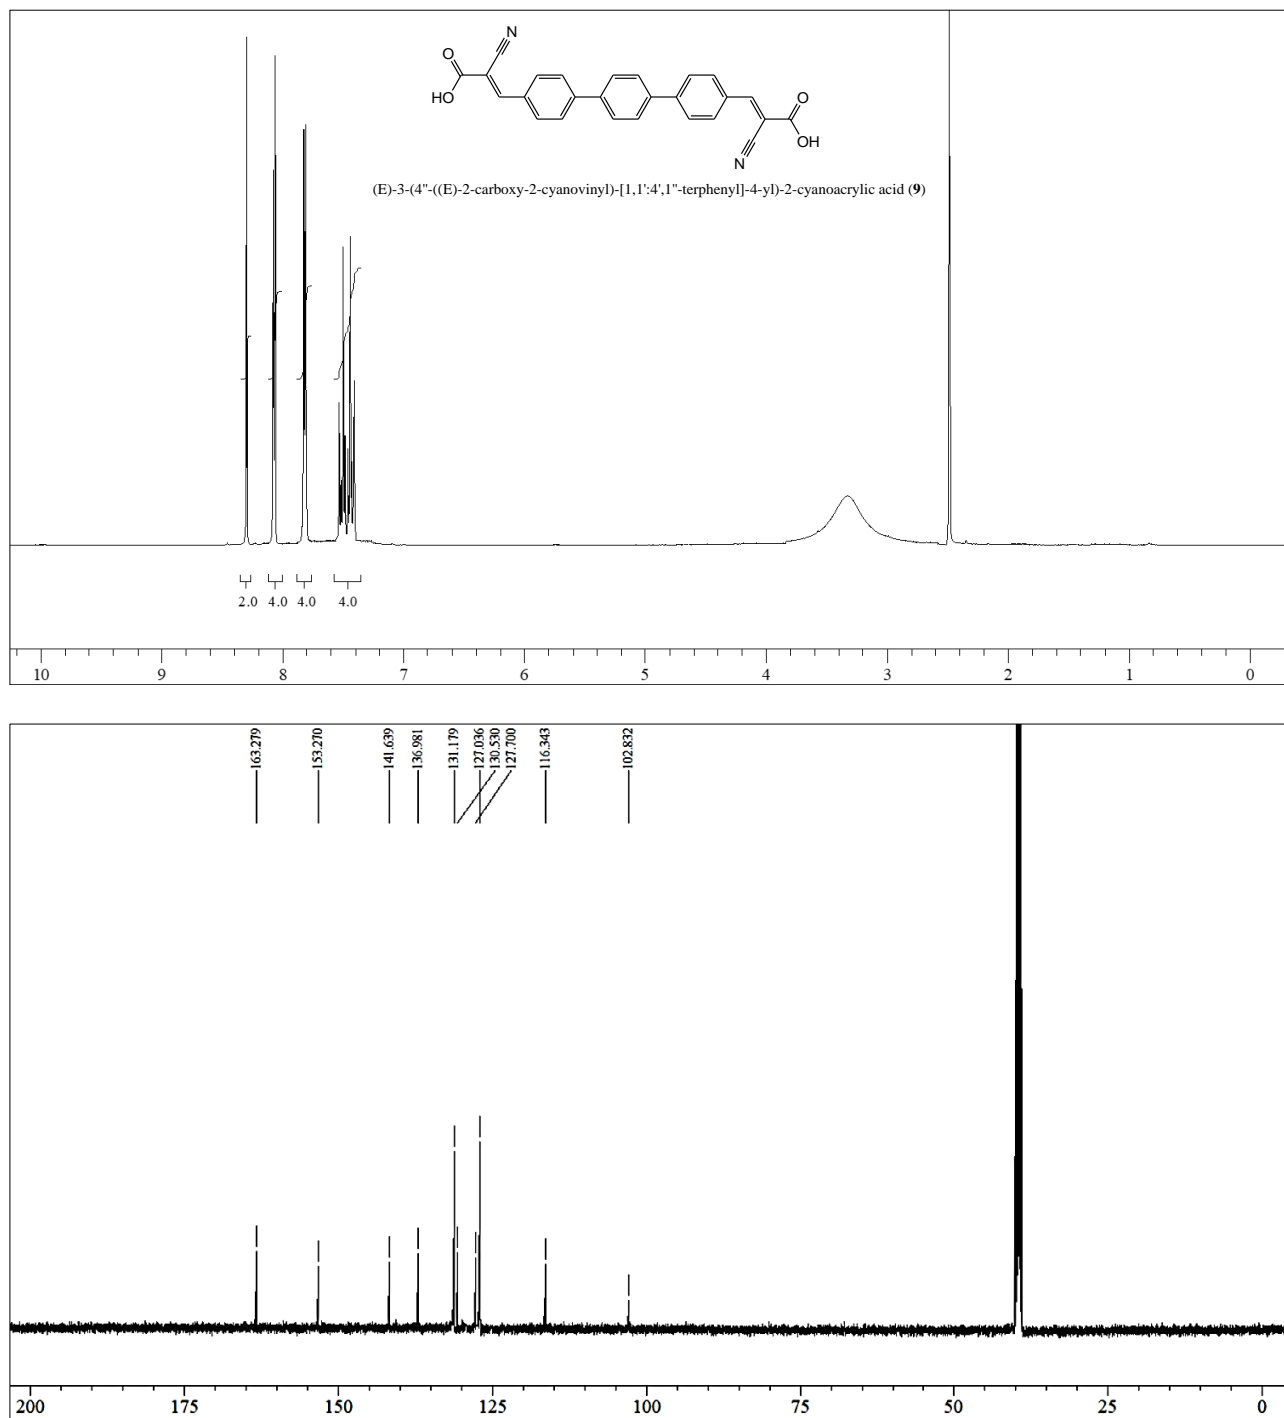

**Figure S11.** <sup>1</sup>H-NMR and <sup>13</sup>C-NMR spectra of the compound **9**.

*(E)*-2-cyano-3-(quinolin-4-yl)acrylic acid (**10**). This acid was obtained as a brown solid in a 65% of yield.  $^1\text{H}$ -NMR (400 MHz, DMSO- $\text{D}_6$ ),  $\delta$ : 7.73 (t, 1 H,  $J = 7.33$ ), 7.88 (m, 2 H), 8.05 (d, 1 H,  $J = 7.83$  Hz), 8.14 (d, 1 H,  $J = 8.31$  Hz), 8.99 (s, 1 H), 9.08 (d, 1 H,  $J = 3.91$  Hz);  $^{13}\text{C}$ -NMR (DMSO- $\text{D}_6$ )  $\delta$ : 161.98, 150.99, 150.22, 147.64, 137.46, 130.24, 129.62, 127.78, 124.57, 124.10, 120.17, 114.71, 112.17. HRMS (ESI-TOF)  $m/z$   $[\text{M}+\text{H}]^+$ : calcd for  $\text{C}_{13}\text{H}_9\text{N}_2\text{O}_2^+$  225,0659, found 225,0648.

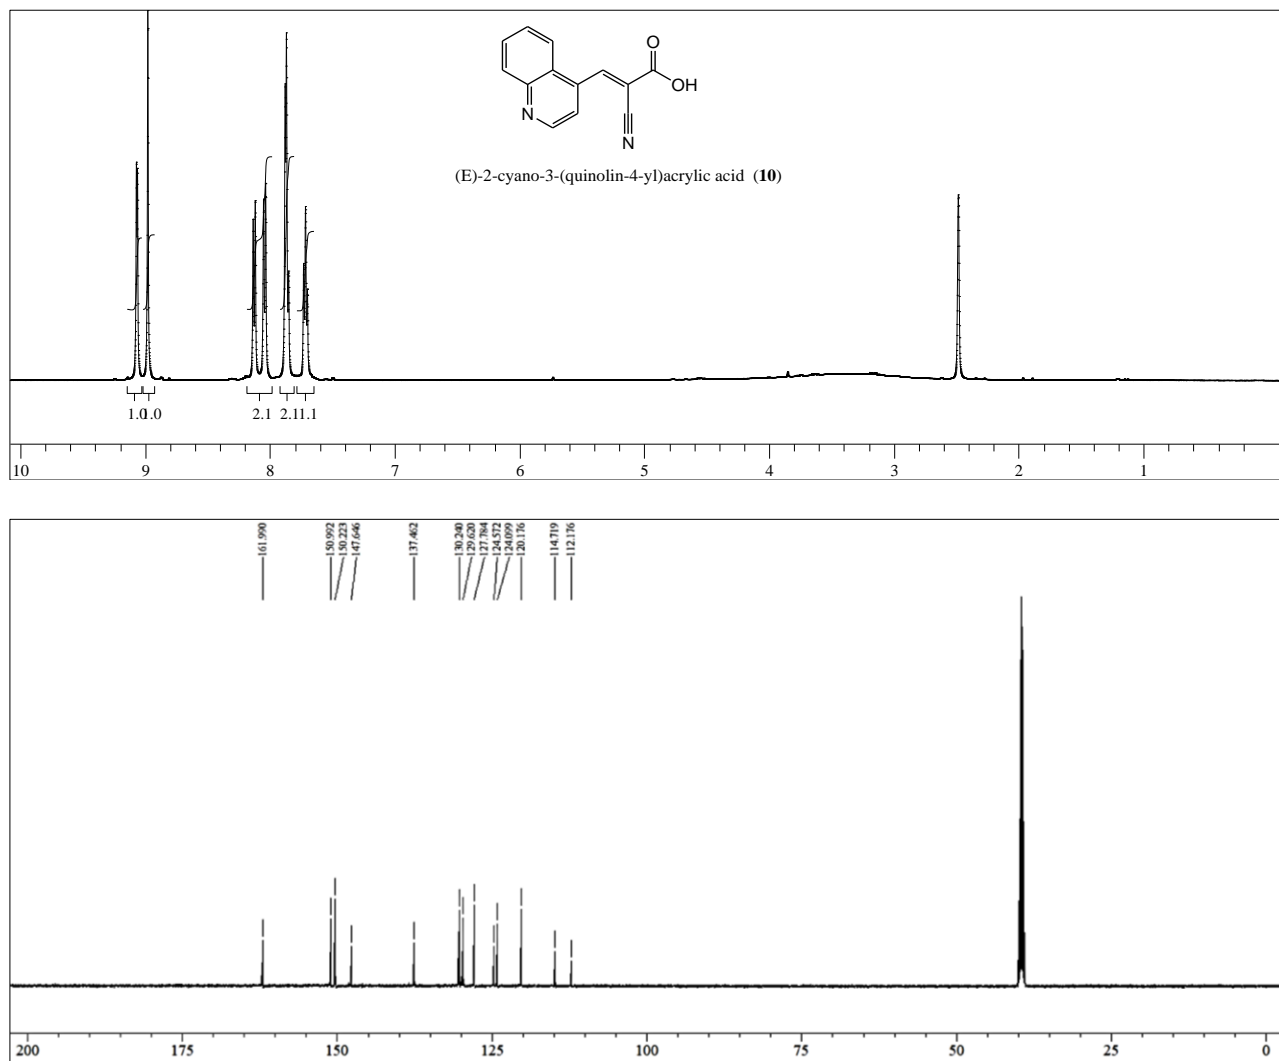

**Figure S12.**  $^1\text{H}$ -NMR and  $^{13}\text{C}$ -NMR spectra of the compound **10**
